# Supplementary material for: Development of New Tuberculosis Vaccines: A Global Perspective on Regulatory Issues
Source: PLOS journal article supplement (doi:10.1371/journal.pmed.0040252), 2007-08-02
Supplement: S1 (10.1371/journal.pmed.0040252.s001) [file journal.pmed.0040252.s001]

*List of Meeting Participants:*

**DCVRN: Dr Joey Gouws**, Inspectorate and Law Enforcement Cluster: Medicines Regulatory Affairs, Department of Health, Pretoria, South Africa; **Dr Yin Hongzhang**, State Food and Drug Administration, Beijing, People's Republic of China; **Dr Seog Youn Kang**, Department of Pharmacology, National Institute of Safety Research, Seoul, Republic of Korea; **Dr Yupin Lawanprasert**, Food and Drug Administration, Ministry of Public Health, Nonthaburi, Thailand; **Dr N.V. Medunitsin**, Tarashevich State Research Institute for Standardization and Control of Medical Biological Preparations, Moscow, Russian Federation; **Dr Sérgio de Andrade Nishioka**, Agência Nacional de Vigilância Sanitária, Brasília, Brazil; **Dr Deybis Orta Hernandez**, Center for State Control of Drug Quality, Habana, Cuba; **Dr A.B. Ramteke**, Directorate General of Health Services, New Delhi, India; **Ms Antonia Retno Tyas Utami**, Sub-directorate of Copy Drug and Biological Product Evaluation, National Agency of Drug and Food Control, Jakarta, Indonesia; *Regulatory and TB Vaccine Experts:* **Dr Lew Barker**, Aeras Global TB Vaccine Foundation, Rockville, USA; **Dr Michael J. Brennan**, Food and Drug Administration - Center for Biologics, Evaluation & Research, Bethesda, USA; **Dr Daniel F. Hoft**, St. Louis University Health Sciences Center, St. Louis, USA; **Dr Tony Hawkrige**, Department of Paediatrics and Child Health, University of Cape Town, Rondebosch, South Africa; **Dr Harriet Mayanja-Kizza**, Makerere Medical School, Kampala, Uganda; **Dr Helen McShane**, Centre for Vaccinology and Tropical Medicine, Oxford, United Kingdom; **Dr Mair Powell**, Medicines and Healthcare Products, London, United Kingdom; **Dr Christine Sizemore**, National Institute for Allergy and Respiratory Diseases National Institutes of Health, Bethesda, USA; **Dr**

**Rosemary Tiernan**, Food and Drug Administration-Center for Biologics Evaluation and Research, Rockville, USA; **Dr Barry Walker**, National Institute for Biological Standards and Control, Potters Bar, United Kingdom ***WHO secretariat:*** **Dr. Uli Fruth**, Initiative for Vaccine Research, Immunization, Vaccines and Biologicals; **Dr. Ivana Knezevic**, Quality, Safety and Standards; Dr. **Liliana Chocarro**, Quality, Safety and Standards, Immunization, Vaccines and Biologicals, World Health Organization, Geneva, Switzerland.
